# Supplementary material
Source: MDPI journal article supplement (https://www.mdpi.com/2073-4395/9/2/74)
Supplement: s1 [file s1]

## Supplementary Materials

**Table S1.** Polynomial contrasts on the means of adventitious root number, root dry mass, total root length, total root surface area, root volume and average root diameter of basil, tomato, and chrysanthemum cuttings as affected by biostimulant and auxin applications.

| Plant Species | Root number | Root dry mass (g plant <sup>-1</sup> ) | Total root length (mm) | Root surface area (mm <sup>2</sup> ) | Root volume (mm <sup>3</sup> ) | Root diameter (mm) |
|---------------|-------------|----------------------------------------|------------------------|--------------------------------------|--------------------------------|--------------------|
| Basil         | ns          | ns                                     | ns                     | *                                    | *                              | ns                 |
| Tomato        | ***         | ns                                     | ***                    | ns                                   | ns                             | ***                |
| Chrysanthemum | ***         | ***                                    | ***                    | ***                                  | **                             | **                 |

ns, \*, \*\*, and \*\*\* indicate non-significant, or significant at  $P < 0.05$ , 0.01, and 0.001, respectively.

**Table S2.** Polynomial contrasts on the means of root diameter class (mm) and relative diameter class length (%) of basil, tomato, and chrysanthemum cuttings as affected by biostimulant and auxin applications. Percentage values at each diameter class are given.

| Plant Species                           | Root diameter class (mm) |           |           |           |       |
|-----------------------------------------|--------------------------|-----------|-----------|-----------|-------|
|                                         | 0-0.25                   | 0.25-0.50 | 0.50-0.75 | 0.75-1.00 | >1.00 |
| Relative root diameter class length (%) |                          |           |           |           |       |
| Basil                                   | ns                       | ns        | ns        | ns        | ns    |
| Tomato                                  | ***                      | ns        | ***       | ***       | ***   |
| Chrysanthemum                           | ***                      | *         | ***       | ***       | ***   |

ns, \*, \*\*, and \*\*\* indicate non-significant, or significant at  $P < 0.05$ , 0.01, and 0.001, respectively.

**Table S3.** Polynomial contrasts on the means of on stem length, leaves, stems, and shoot dry mass, SPAD index, and root-to-shoot ratio of basil, tomato, and chrysanthemum cuttings as affected by biostimulant and auxin applications. Percentage values at each diameter class are given.

| Plant Species | Stem length (cm) | Dry mass (g plant <sup>-1</sup> ) |        |       | SPAD Index | Root-to-shoot ratio |
|---------------|------------------|-----------------------------------|--------|-------|------------|---------------------|
|               |                  | Shoots                            | Leaves | Stems |            |                     |
| Basil         | ns               | ns                                | ns     | ns    | ns         | ns                  |
| Tomato        | ns               | **                                | ***    | ns    | ns         | *                   |
| Chrysanthemum | ***              | ns                                | ns     | *     | *          | ***                 |

ns, \*, \*\*, and \*\*\* indicate non-significant, or significant at  $P < 0.05$ , 0.01, and 0.001, respectively.

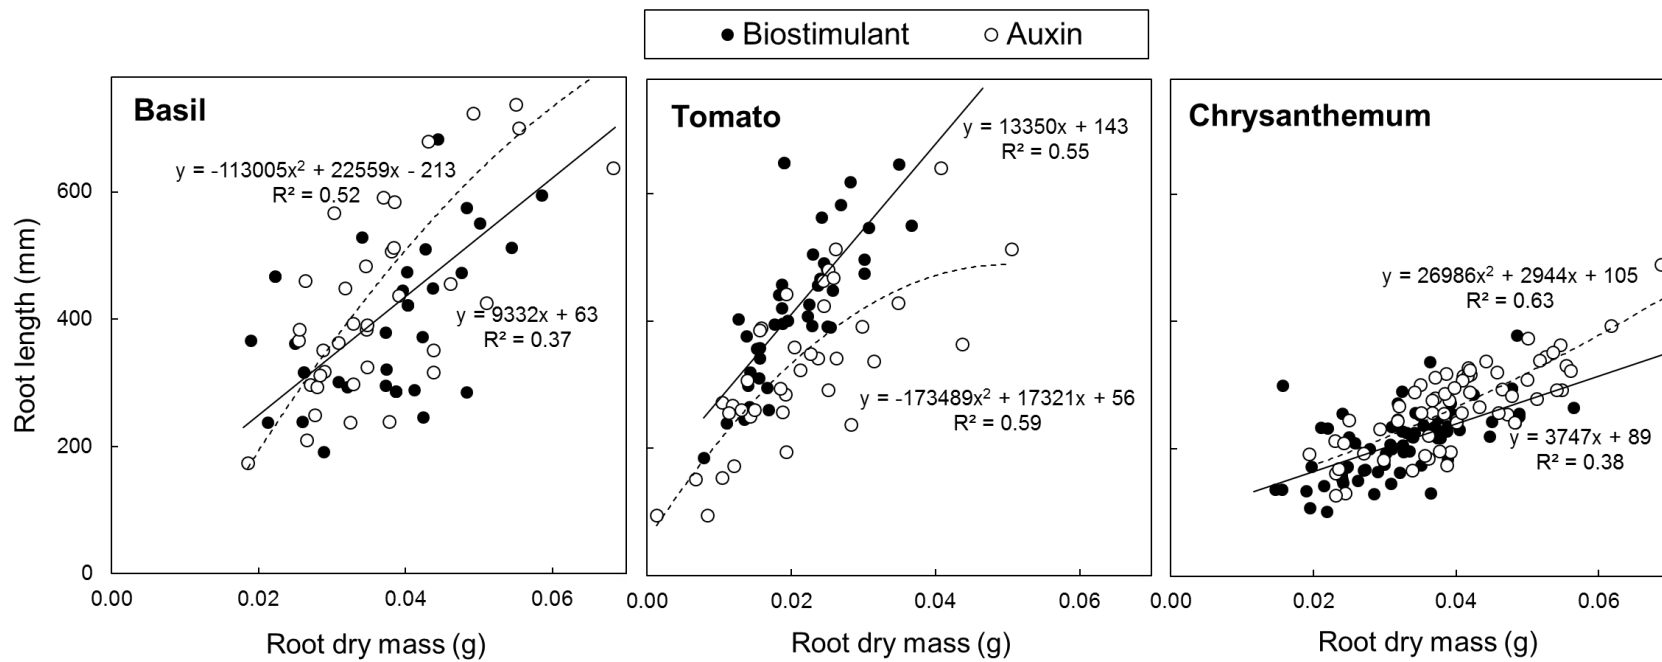

**Figure S1** | The relationship between root dry mass and total root length of basil, tomato, and chrysanthemum cuttings as affected by biostimulant and auxin applications.
